# Supplementary material
Source: publisher figshare collection journal article supplement (https://karger.figshare.com/ndownloader/files/16903559)
Supplement: Supplementary file 1 [file 16903559]

Supplementary Figure 1. Cumulative incidence of neutrophil and platelet engraftment

Figures A-B shows cumulative incidence comparing bone marrow and peripheral blood as stem cell source for neutrophil engraftment (A) and for platelet engraftment (B). Figures C-D shows cumulative incidence comparing infused CD34+ cells≥3×106/kg vs. CD34+ cells<3×106/kg for neutrophil engraftment (C) and for platelet engraftment (D).
